# Supplementary material for: Impact of Ascorbic Acid on Zero-Valent Iron Nanoparticle and UV-B Mediated Stress in the Cyanobacterium, Fremyella diplosiphon
Source: MDPI journal article supplement (doi:10.3390/microorganisms11051245), 2023-05-09
Supplement: s1 [file s1]

## Supplementary figures

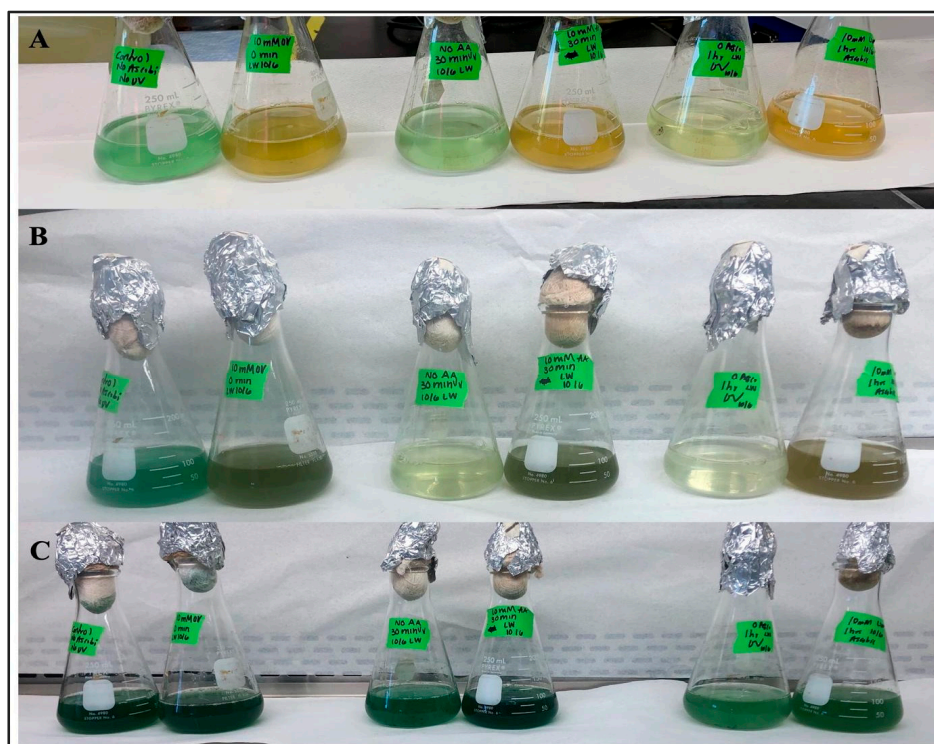

**Figure S1.** *Fremyella diplosiphon* cultures were treated with zero-valent iron nanoparticles (nZVIs) and 10 mM ascorbic acid on (A) day 3, (B) day 6, and (C) day 9. Reversal of UV-induced oxidative was observed day 9 and continued until day 15 (all images are not shown).

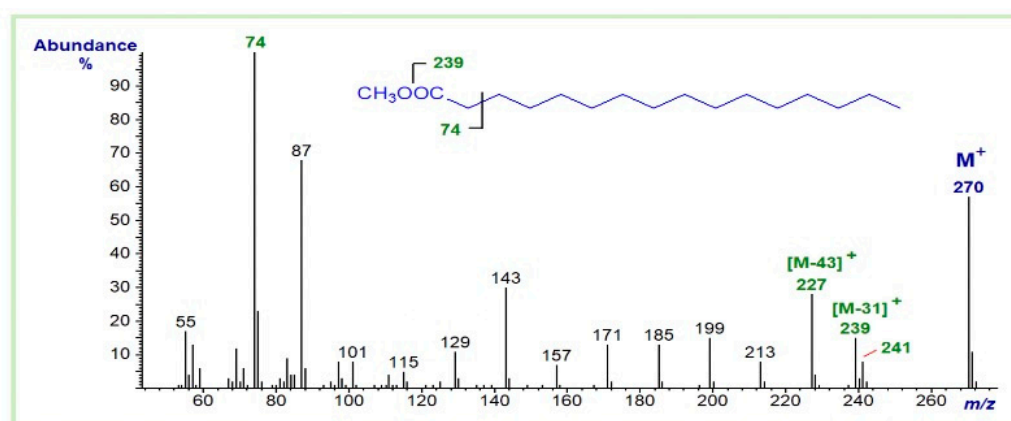

**Figure S2.** Representative chromatogram of hexadecanoate, which was identified as the primary fatty acid methyl ester identified in *Fremyella diplosiphon* transesterified lipids.
